# Supplementary material
Source: publisher figshare collection journal article supplement (https://acs.figshare.com/ndownloader/files/4227328)
Supplement: Supplementary file 1 [file 4227328]

# 1. SUBMISSION DETAILS

_publ_contact_author_name         'Jian Zhang'
_publ_contact_author_address
;
State Key Laboratory of Structural Chemistry, 
Fujian Institute of Research on the Structure of Matter, CAS
Fuzhou, Fujian, China 350002
;
_publ_contact_author_email        'zhj@fjirsm.ac.cn'
_publ_contact_author_phone        ''
_publ_contact_author_fax          ?

_publ_requested_journal           'Chem.Commun.'

  
data_825849 
  
_audit_creation_method            SHELXL-97 
_chemical_name_systematic 
; 
 ? 
; 
_chemical_name_common             ? 
_chemical_melting_point           ? 
_chemical_formula_moiety          ? 
_chemical_formula_sum 
 'C22 H14 N2 O14 Zn4' 
_chemical_formula_weight          791.83 
  
loop_ 
 _atom_type_symbol 
 _atom_type_description 
 _atom_type_scat_dispersion_real 
 _atom_type_scat_dispersion_imag 
 _atom_type_scat_source 
 'Zn'  'Zn'  -1.5491   0.6778 
 'International Tables Vol C Tables 4.2.6.8 and 6.1.1.4' 
 'O'  'O'   0.0492   0.0322 
 'International Tables Vol C Tables 4.2.6.8 and 6.1.1.4' 
 'H'  'H'   0.0000   0.0000 
 'International Tables Vol C Tables 4.2.6.8 and 6.1.1.4' 
 'C'  'C'   0.0181   0.0091 
 'International Tables Vol C Tables 4.2.6.8 and 6.1.1.4' 
 'N'  'N'   0.0311   0.0180 
 'International Tables Vol C Tables 4.2.6.8 and 6.1.1.4' 
  
_symmetry_cell_setting            Monoclinic 
_symmetry_space_group_name_H-M    P2(1) 
  
loop_ 
 _symmetry_equiv_pos_as_xyz 
 'x, y, z' 
 '-x, y+1/2, -z' 
  
_cell_length_a                    19.293(4) 
_cell_length_b                    14.332(3) 
_cell_length_c                    10.3246(14) 
_cell_angle_alpha                 90.00 
_cell_angle_beta                  90.114(10) 
_cell_angle_gamma                 90.00 
_cell_volume                      2854.8(9) 
_cell_formula_units_Z             2 
_cell_measurement_temperature     293(2) 
_cell_measurement_reflns_used     827
_cell_measurement_theta_min       3.18
_cell_measurement_theta_max       25.03
  
_exptl_crystal_description        prism 
_exptl_crystal_colour             colorless 
_exptl_crystal_size_max           .23 
_exptl_crystal_size_mid           .15 
_exptl_crystal_size_min           .11 
_exptl_crystal_density_meas       ? 
_exptl_crystal_density_diffrn     0.921 
_exptl_crystal_density_method     'not measured' 
_exptl_crystal_F_000              784 
_exptl_absorpt_coefficient_mu     2.224 
_exptl_absorpt_correction_type    none 
_exptl_absorpt_correction_T_min   ? 
_exptl_absorpt_correction_T_max   ? 
_exptl_absorpt_process_details    none 
  
_exptl_special_details 
; 
 ? 
; 
  
_diffrn_ambient_temperature       293(2) 
_diffrn_radiation_wavelength      1.54780 
_diffrn_radiation_type            MoK\a 
_diffrn_radiation_source          'fine-focus sealed tube' 
_diffrn_radiation_monochromator   graphite 
_diffrn_measurement_device_type   'Bruker P4' 
_diffrn_measurement_method        '\w scans' 
_diffrn_detector_area_resol_mean  none  
_diffrn_standards_number          none 
_diffrn_standards_interval_count  none 
_diffrn_standards_interval_time   none 
_diffrn_standards_decay_%         none  
_diffrn_reflns_number             23529 
_diffrn_reflns_av_R_equivalents   0.0749 
_diffrn_reflns_av_sigmaI/netI     0.1153 
_diffrn_reflns_limit_h_min        -24 
_diffrn_reflns_limit_h_max        24 
_diffrn_reflns_limit_k_min        -18 
_diffrn_reflns_limit_k_max        12 
_diffrn_reflns_limit_l_min        -13 
_diffrn_reflns_limit_l_max        13 
_diffrn_reflns_theta_min          4.60 
_diffrn_reflns_theta_max          89.85 
_reflns_number_total              10661 
_reflns_number_gt                 6933 
_reflns_threshold_expression      >2sigma(I) 
  
_computing_data_collection        'Bruker XSCANS' 
_computing_cell_refinement        'Bruker XSCANS' 
_computing_data_reduction         'Bruker SHELXTL' 
_computing_structure_solution     'SHELXS-97 (Sheldrick, 1990)' 
_computing_structure_refinement   'SHELXL-97 (Sheldrick, 1997)' 
_computing_molecular_graphics     'Bruker SHELXTL' 
_computing_publication_material   'Bruker SHELXTL' 
  
_refine_special_details 
; 
 Refinement of F^2^ against ALL reflections.  The weighted R-factor wR and 
 goodness of fit S are based on F^2^, conventional R-factors R are based 
 on F, with F set to zero for negative F^2^. The threshold expression of 
 F^2^ > 2sigma(F^2^) is used only for calculating R-factors(gt) etc. and is 
 not relevant to the choice of reflections for refinement.  R-factors based 
 on F^2^ are statistically about twice as large as those based on F, and R- 
 factors based on ALL data will be even larger. 
# SQUEEZE RESULTS (APPEND TO CIF)
loop_
  _platon_squeeze_void_nr
  _platon_squeeze_void_average_x
  _platon_squeeze_void_average_y
  _platon_squeeze_void_average_z
  _platon_squeeze_void_volume
  _platon_squeeze_void_count_electrons
         1     0.152     0.020    -0.056    1802.8     405.7
_platon_squeeze_details
; 
  
_refine_ls_structure_factor_coef  Fsqd 
_refine_ls_matrix_type            full 
_refine_ls_weighting_scheme       calc 
_refine_ls_weighting_details 
 'calc w=1/[\s^2^(Fo^2^)+(0.0456P)^2^+0.0000P] where P=(Fo^2^+2Fc^2^)/3' 
_atom_sites_solution_primary      direct 
_atom_sites_solution_secondary    difmap 
_atom_sites_solution_hydrogens    geom 
_refine_ls_hydrogen_treatment     none  
_refine_ls_extinction_method      none 
_refine_ls_extinction_coef        ? 
_refine_ls_abs_structure_details 
 'Flack H D (1983), Acta Cryst. A39, 876-881' 
_refine_ls_abs_structure_Flack    -0.08(5) 
_refine_ls_number_reflns          10661 
_refine_ls_number_parameters      381 
_refine_ls_number_restraints      1 
_refine_ls_R_factor_all           0.0631 
_refine_ls_R_factor_gt            0.0494 
_refine_ls_wR_factor_ref          0.1314 
_refine_ls_wR_factor_gt           0.1235 
_refine_ls_goodness_of_fit_ref    0.864 
_refine_ls_restrained_S_all       0.864 
_refine_ls_shift/su_max           0.050 
_refine_ls_shift/su_mean          0.031 
  
loop_ 
 _atom_site_label 
 _atom_site_type_symbol 
 _atom_site_fract_x 
 _atom_site_fract_y 
 _atom_site_fract_z 
 _atom_site_U_iso_or_equiv 
 _atom_site_adp_type 
 _atom_site_occupancy 
 _atom_site_symmetry_multiplicity 
 _atom_site_calc_flag 
 _atom_site_refinement_flags 
 _atom_site_disorder_assembly 
 _atom_site_disorder_group 
Zn1 Zn 0.25370(5) 0.58110(7) 0.84488(11) 0.0339(3) Uani 1 1 d . . . 
Zn2 Zn 0.25274(5) 0.51172(8) 0.53018(11) 0.0365(3) Uani 1 1 d . . . 
Zn3 Zn 0.24626(5) 0.71712(7) 0.34462(11) 0.0331(3) Uani 1 1 d . . . 
Zn4 Zn 0.24741(5) 0.78701(8) 0.02978(11) 0.0366(3) Uani 1 1 d . . . 
O1 O 0.2521(3) 0.6296(5) 0.6466(6) 0.052(2) Uani 1 1 d . . . 
O2 O 0.2379(4) 0.7617(6) 0.5339(8) 0.088(3) Uani 1 1 d . . . 
O4 O 0.2477(3) 0.6668(5) 0.1467(7) 0.050(2) Uani 1 1 d . . . 
O5 O 0.2608(4) 0.5396(5) 0.0309(7) 0.073(2) Uani 1 1 d . . . 
O7 O 0.3391(4) 0.4672(6) 0.6019(8) 0.085(3) Uani 1 1 d . . . 
O8 O 0.3414(4) 0.5139(7) 0.8104(9) 0.092(3) Uani 1 1 d . . . 
O9 O 0.6697(3) 0.2902(6) 0.6844(7) 0.079(2) Uani 1 1 d . . . 
O10 O 0.6664(3) 0.3364(6) 0.8913(9) 0.082(3) Uani 1 1 d . . . 
O11 O 0.1656(4) 0.4670(6) 0.6088(10) 0.091(3) Uani 1 1 d . . . 
O12 O 0.1688(3) 0.5092(5) 0.8141(7) 0.0709(19) Uani 1 1 d . . . 
O13 O -0.1585(3) 0.2858(7) 0.6877(9) 0.102(3) Uani 1 1 d . . . 
O14 O -0.1603(4) 0.3337(6) 0.8992(9) 0.086(3) Uani 1 1 d . . . 
C1 C 0.2438(5) 0.7187(10) 0.6338(9) 0.060(3) Uani 1 1 d . . . 
C2 C 0.2257(6) 0.7717(8) 0.7597(9) 0.072(3) Uani 1 1 d . . . 
H2A H 0.1771 0.7916 0.7623 0.087 Uiso 1 1 calc R . . 
C3 C 0.2751(6) 0.8525(10) 0.7631(13) 0.109(4) Uani 1 1 d . . . 
H3A H 0.2702 0.8929 0.6882 0.131 Uiso 1 1 calc R . . 
H3B H 0.3229 0.8328 0.7722 0.131 Uiso 1 1 calc R . . 
C4 C 0.2559(4) 0.5833(8) 0.1321(10) 0.046(2) Uani 1 1 d . . . 
C5 C 0.2700(7) 0.5304(7) 0.2593(9) 0.082(3) Uani 1 1 d . . . 
H5A H 0.3199 0.5177 0.2611 0.098 Uiso 1 1 calc R . . 
C6 C 0.2354(5) 0.4390(7) 0.2643(9) 0.072(2) Uani 1 1 d . . . 
H6A H 0.2517 0.3989 0.1950 0.087 Uiso 1 1 calc R . . 
H6B H 0.1856 0.4460 0.2566 0.087 Uiso 1 1 calc R . . 
C7 C 0.3672(5) 0.4754(8) 0.7131(13) 0.067(3) Uani 1 1 d . . . 
C8 C 0.4376(5) 0.4391(9) 0.7331(13) 0.076(4) Uani 1 1 d . . . 
C9 C 0.4735(6) 0.3947(9) 0.6204(14) 0.101(4) Uani 1 1 d . . . 
H9A H 0.4518 0.3883 0.5404 0.122 Uiso 1 1 calc R . . 
C10 C 0.5399(5) 0.3638(10) 0.6408(13) 0.092(4) Uani 1 1 d . . . 
H10A H 0.5653 0.3409 0.5712 0.111 Uiso 1 1 calc R . . 
C11 C 0.5710(5) 0.3660(8) 0.7662(12) 0.073(3) Uani 1 1 d . . . 
C12 C 0.5346(5) 0.3990(10) 0.8652(12) 0.102(6) Uani 1 1 d . . . 
H12A H 0.5531 0.3929 0.9480 0.122 Uiso 1 1 calc R . . 
C13 C 0.4690(6) 0.4432(11) 0.8515(11) 0.097(5) Uani 1 1 d . . . 
H13A H 0.4482 0.4738 0.9207 0.117 Uiso 1 1 calc R . . 
C14 C 0.6417(5) 0.3309(8) 0.7817(11) 0.063(3) Uani 1 1 d . . . 
C15 C 0.1404(5) 0.4765(9) 0.7200(13) 0.070(3) Uani 1 1 d . . . 
C18 C -0.0320(5) 0.3624(9) 0.6473(10) 0.076(4) Uani 1 1 d . . . 
H18A H -0.0568 0.3386 0.5773 0.091 Uiso 1 1 calc R . . 
C19 C -0.0628(5) 0.3636(7) 0.7701(11) 0.061(3) Uani 1 1 d . . . 
C20 C -0.0276(5) 0.3994(9) 0.8709(10) 0.099(5) Uani 1 1 d . . . 
H20A H -0.0479 0.3973 0.9524 0.119 Uiso 1 1 calc R . . 
C21 C 0.0405(6) 0.4410(12) 0.8590(13) 0.121(6) Uani 1 1 d . . . 
H21A H 0.0624 0.4697 0.9287 0.146 Uiso 1 1 calc R . . 
C22 C -0.1340(5) 0.3279(8) 0.7876(13) 0.068(3) Uani 1 1 d . . . 
N1 N 0.2448(3) 0.7183(7) 0.8694(7) 0.0388(16) Uani 1 1 d . . . 
N2 N 0.2557(3) 0.5869(6) 0.3721(7) 0.0376(16) Uani 1 1 d . . . 
O3 O 0.2453(4) 0.8994(9) 0.8934(14) 0.131(4) Uani 1 1 d . . . 
O6 O 0.2539(3) 0.4006(7) 0.3898(10) 0.090(3) Uani 1 1 d . . . 
C17 C 0.0356(6) 0.3965(9) 0.6279(15) 0.105(5) Uani 1 1 d . . . 
H17A H 0.0567 0.3939 0.5470 0.126 Uiso 1 1 calc R . . 
C16 C 0.0711(5) 0.4357(10) 0.7389(13) 0.085(4) Uani 1 1 d . . . 
  
loop_ 
 _atom_site_aniso_label 
 _atom_site_aniso_U_11 
 _atom_site_aniso_U_22 
 _atom_site_aniso_U_33 
 _atom_site_aniso_U_23 
 _atom_site_aniso_U_13 
 _atom_site_aniso_U_12 
Zn1 0.0460(5) 0.0362(7) 0.0195(7) -0.0019(5) 0.0021(4) 0.0023(4) 
Zn2 0.0530(6) 0.0368(8) 0.0197(6) 0.0014(6) 0.0011(4) 0.0005(4) 
Zn3 0.0452(5) 0.0349(7) 0.0192(7) 0.0014(5) 0.0000(4) 0.0016(4) 
Zn4 0.0529(6) 0.0374(8) 0.0194(6) -0.0023(6) 0.0013(4) 0.0003(4) 
O1 0.086(5) 0.049(5) 0.021(4) 0.006(3) -0.004(3) -0.006(3) 
O2 0.159(7) 0.077(7) 0.028(4) 0.017(3) -0.002(4) 0.035(5) 
O4 0.064(4) 0.039(5) 0.046(5) 0.009(3) 0.008(3) -0.001(3) 
O5 0.149(6) 0.047(5) 0.023(3) 0.000(3) 0.005(4) 0.021(4) 
O7 0.104(5) 0.098(7) 0.053(6) -0.010(5) -0.010(4) 0.040(4) 
O8 0.080(5) 0.125(7) 0.071(6) -0.007(6) 0.003(4) 0.050(5) 
O9 0.070(4) 0.121(6) 0.045(5) 0.022(5) 0.005(3) 0.030(4) 
O10 0.073(4) 0.078(6) 0.096(8) -0.021(5) -0.014(4) 0.021(4) 
O11 0.080(5) 0.118(8) 0.075(7) -0.025(6) 0.015(5) -0.038(5) 
O12 0.088(4) 0.082(5) 0.042(4) -0.001(4) -0.004(3) -0.029(4) 
O13 0.065(4) 0.161(8) 0.080(7) 0.026(7) -0.006(4) -0.055(5) 
O14 0.103(5) 0.089(7) 0.067(6) -0.007(5) 0.016(5) -0.038(4) 
C1 0.099(7) 0.059(7) 0.023(5) 0.009(5) 0.004(4) 0.020(5) 
C2 0.120(8) 0.062(7) 0.035(5) -0.002(4) -0.002(5) 0.018(6) 
C3 0.164(9) 0.093(10) 0.070(11) -0.005(8) 0.000(8) -0.021(8) 
C4 0.073(5) 0.025(5) 0.041(6) 0.011(4) 0.005(4) 0.006(4) 
C5 0.165(11) 0.051(6) 0.029(5) -0.008(4) 0.000(6) 0.009(7) 
C6 0.112(5) 0.060(6) 0.045(6) 0.001(5) 0.000(5) -0.011(5) 
C7 0.075(6) 0.059(7) 0.068(9) 0.008(6) 0.006(6) 0.008(5) 
C8 0.070(6) 0.098(9) 0.060(9) 0.002(8) -0.002(6) 0.036(6) 
C9 0.104(9) 0.128(12) 0.072(9) -0.012(8) 0.012(7) 0.038(8) 
C10 0.079(7) 0.117(10) 0.082(10) -0.012(9) -0.018(6) 0.054(7) 
C11 0.081(7) 0.075(8) 0.063(8) 0.006(7) 0.005(5) 0.030(6) 
C12 0.082(7) 0.176(15) 0.049(7) -0.022(8) -0.014(6) 0.076(8) 
C13 0.095(8) 0.162(13) 0.035(6) -0.001(7) 0.010(5) 0.061(8) 
C14 0.068(6) 0.081(8) 0.041(6) -0.005(6) 0.000(5) 0.029(5) 
C15 0.075(7) 0.088(9) 0.047(8) 0.005(6) -0.006(6) -0.029(5) 
C18 0.088(7) 0.099(9) 0.042(7) -0.015(6) -0.002(5) -0.054(6) 
C19 0.071(5) 0.058(6) 0.054(7) -0.006(5) 0.006(5) -0.024(4) 
C20 0.099(7) 0.160(13) 0.038(6) -0.016(7) 0.023(5) -0.081(8) 
C21 0.077(8) 0.216(17) 0.070(10) 0.004(10) 0.018(7) -0.065(9) 
C22 0.074(6) 0.064(7) 0.066(9) -0.009(6) -0.002(6) -0.027(5) 
N1 0.081(4) 0.026(4) 0.010(3) -0.002(3) -0.005(3) 0.013(3) 
N2 0.071(4) 0.029(4) 0.014(3) 0.000(3) 0.001(3) 0.004(3) 
O3 0.210(8) 0.110(12) 0.073(11) -0.002(8) 0.006(7) 0.002(6) 
O6 0.151(5) 0.057(8) 0.063(8) 0.005(6) 0.003(5) 0.001(4) 
C17 0.097(9) 0.124(11) 0.093(13) -0.015(9) 0.011(8) -0.035(7) 
C16 0.072(7) 0.120(11) 0.062(8) 0.010(8) -0.002(6) -0.048(7) 
  
_geom_special_details 
; 
 All esds (except the esd in the dihedral angle between two l.s. planes) 
 are estimated using the full covariance matrix.  The cell esds are taken 
 into account individually in the estimation of esds in distances, angles 
 and torsion angles; correlations between esds in cell parameters are only 
 used when they are defined by crystal symmetry.  An approximate (isotropic) 
 treatment of cell esds is used for estimating esds involving l.s. planes. 
; 
  
loop_ 
 _geom_bond_atom_site_label_1 
 _geom_bond_atom_site_label_2 
 _geom_bond_distance 
 _geom_bond_site_symmetry_2 
 _geom_bond_publ_flag 
Zn1 O12 1.960(6) . ? 
Zn1 O8 1.980(7) . ? 
Zn1 N1 1.991(10) . ? 
Zn1 O5 2.015(7) 1_556 ? 
Zn1 O1 2.162(7) . ? 
Zn2 O7 1.931(7) . ? 
Zn2 N2 1.957(9) . ? 
Zn2 O11 1.976(7) . ? 
Zn2 O1 2.073(7) . ? 
Zn2 O6 2.154(11) . ? 
Zn3 N2 1.896(9) . ? 
Zn3 O9 1.954(7) 2_656 ? 
Zn3 O13 1.987(7) 2_556 ? 
Zn3 O2 2.062(8) . ? 
Zn3 O4 2.167(7) . ? 
Zn4 N1 1.926(8) 1_554 ? 
Zn4 O14 1.954(7) 2_556 ? 
Zn4 O10 1.981(7) 2_656 ? 
Zn4 O4 2.104(7) . ? 
Zn4 O3 2.140(14) 1_554 ? 
O1 C1 1.294(15) . ? 
O2 C1 1.207(12) . ? 
O4 C4 1.216(13) . ? 
O5 C4 1.222(13) . ? 
O5 Zn1 2.015(7) 1_554 ? 
O7 C7 1.274(14) . ? 
O8 C7 1.250(14) . ? 
O9 C14 1.282(13) . ? 
O9 Zn3 1.954(7) 2_646 ? 
O10 C14 1.230(13) . ? 
O10 Zn4 1.981(7) 2_646 ? 
O11 C15 1.255(14) . ? 
O12 C15 1.209(13) . ? 
O13 C22 1.284(14) . ? 
O13 Zn3 1.987(7) 2_546 ? 
O14 C22 1.263(14) . ? 
O14 Zn4 1.954(7) 2_546 ? 
C1 C2 1.546(14) . ? 
C2 N1 1.415(13) . ? 
C2 C3 1.499(16) . ? 
C2 H2A 0.9800 . ? 
C3 O3 1.612(16) . ? 
C3 H3A 0.9700 . ? 
C3 H3B 0.9700 . ? 
C4 C5 1.540(13) . ? 
C5 N2 1.446(12) . ? 
C5 C6 1.472(14) . ? 
C5 H5A 0.9800 . ? 
C6 O6 1.452(13) . ? 
C6 H6A 0.9700 . ? 
C6 H6B 0.9700 . ? 
C7 C8 1.468(12) . ? 
C8 C13 1.365(16) . ? 
C8 C9 1.497(17) . ? 
C9 C10 1.372(13) . ? 
C9 H9A 0.9300 . ? 
C10 C11 1.426(16) . ? 
C10 H10A 0.9300 . ? 
C11 C12 1.328(15) . ? 
C11 C14 1.462(12) . ? 
C12 C13 1.423(13) . ? 
C12 H12A 0.9300 . ? 
C13 H13A 0.9300 . ? 
C15 C16 1.472(13) . ? 
C18 C19 1.401(14) . ? 
C18 C17 1.409(14) . ? 
C18 H18A 0.9300 . ? 
C19 C20 1.343(14) . ? 
C19 C22 1.477(12) . ? 
C20 C21 1.448(13) . ? 
C20 H20A 0.9300 . ? 
C21 C16 1.377(17) . ? 
C21 H21A 0.9300 . ? 
N1 Zn4 1.926(8) 1_556 ? 
O3 Zn4 2.140(14) 1_556 ? 
C17 C16 1.447(17) . ? 
C17 H17A 0.9300 . ? 
  
loop_ 
 _geom_angle_atom_site_label_1 
 _geom_angle_atom_site_label_2 
 _geom_angle_atom_site_label_3 
 _geom_angle 
 _geom_angle_site_symmetry_1 
 _geom_angle_site_symmetry_3 
 _geom_angle_publ_flag 
O12 Zn1 O8 115.4(4) . . ? 
O12 Zn1 N1 117.9(3) . . ? 
O8 Zn1 N1 125.3(4) . . ? 
O12 Zn1 O5 93.1(3) . 1_556 ? 
O8 Zn1 O5 88.4(3) . 1_556 ? 
N1 Zn1 O5 100.1(3) . 1_556 ? 
O12 Zn1 O1 90.3(3) . . ? 
O8 Zn1 O1 89.8(3) . . ? 
N1 Zn1 O1 78.6(3) . . ? 
O5 Zn1 O1 176.6(3) 1_556 . ? 
O7 Zn2 N2 118.4(3) . . ? 
O7 Zn2 O11 118.0(4) . . ? 
N2 Zn2 O11 123.2(3) . . ? 
O7 Zn2 O1 93.1(3) . . ? 
N2 Zn2 O1 92.0(3) . . ? 
O11 Zn2 O1 91.2(3) . . ? 
O7 Zn2 O6 90.2(3) . . ? 
N2 Zn2 O6 81.1(4) . . ? 
O11 Zn2 O6 92.7(3) . . ? 
O1 Zn2 O6 173.1(3) . . ? 
N2 Zn3 O9 118.1(3) . 2_656 ? 
N2 Zn3 O13 126.4(4) . 2_556 ? 
O9 Zn3 O13 114.6(4) 2_656 2_556 ? 
N2 Zn3 O2 99.8(3) . . ? 
O9 Zn3 O2 92.6(3) 2_656 . ? 
O13 Zn3 O2 86.4(3) 2_556 . ? 
N2 Zn3 O4 79.2(3) . . ? 
O9 Zn3 O4 91.2(3) 2_656 . ? 
O13 Zn3 O4 91.1(3) 2_556 . ? 
O2 Zn3 O4 176.0(3) . . ? 
N1 Zn4 O14 118.5(3) 1_554 2_556 ? 
N1 Zn4 O10 123.8(3) 1_554 2_656 ? 
O14 Zn4 O10 116.4(4) 2_556 2_656 ? 
N1 Zn4 O4 94.3(3) 1_554 . ? 
O14 Zn4 O4 93.8(3) 2_556 . ? 
O10 Zn4 O4 93.2(3) 2_656 . ? 
N1 Zn4 O3 79.6(5) 1_554 1_554 ? 
O14 Zn4 O3 88.5(4) 2_556 1_554 ? 
O10 Zn4 O3 91.0(4) 2_656 1_554 ? 
O4 Zn4 O3 173.8(4) . 1_554 ? 
C1 O1 Zn2 138.3(7) . . ? 
C1 O1 Zn1 114.5(6) . . ? 
Zn2 O1 Zn1 106.7(3) . . ? 
C1 O2 Zn3 130.1(9) . . ? 
C4 O4 Zn4 137.3(7) . . ? 
C4 O4 Zn3 116.5(7) . . ? 
Zn4 O4 Zn3 105.6(3) . . ? 
C4 O5 Zn1 131.2(7) . 1_554 ? 
C7 O7 Zn2 132.9(8) . . ? 
C7 O8 Zn1 134.5(8) . . ? 
C14 O9 Zn3 135.7(7) . 2_646 ? 
C14 O10 Zn4 132.8(8) . 2_646 ? 
C15 O11 Zn2 132.2(8) . . ? 
C15 O12 Zn1 135.4(8) . . ? 
C22 O13 Zn3 132.8(8) . 2_546 ? 
C22 O14 Zn4 131.9(8) . 2_546 ? 
O2 C1 O1 127.0(11) . . ? 
O2 C1 C2 116.5(11) . . ? 
O1 C1 C2 115.3(9) . . ? 
N1 C2 C3 103.6(10) . . ? 
N1 C2 C1 110.4(9) . . ? 
C3 C2 C1 104.7(10) . . ? 
N1 C2 H2A 112.2 . . ? 
C3 C2 H2A 112.2 . . ? 
C1 C2 H2A 113.0 . . ? 
C2 C3 O3 96.5(9) . . ? 
C2 C3 H3A 113.1 . . ? 
O3 C3 H3A 113.5 . . ? 
C2 C3 H3B 112.1 . . ? 
O3 C3 H3B 110.6 . . ? 
H3A C3 H3B 110.3 . . ? 
O4 C4 O5 128.4(10) . . ? 
O4 C4 C5 113.7(10) . . ? 
O5 C4 C5 117.6(10) . . ? 
N2 C5 C6 112.5(10) . . ? 
N2 C5 C4 112.2(9) . . ? 
C6 C5 C4 112.9(9) . . ? 
N2 C5 H5A 105.9 . . ? 
C6 C5 H5A 106.2 . . ? 
C4 C5 H5A 106.5 . . ? 
C5 C6 O6 105.0(8) . . ? 
C5 C6 H6A 110.5 . . ? 
O6 C6 H6A 110.9 . . ? 
C5 C6 H6B 111.3 . . ? 
O6 C6 H6B 110.1 . . ? 
H6A C6 H6B 109.0 . . ? 
O8 C7 O7 126.5(10) . . ? 
O8 C7 C8 114.4(11) . . ? 
O7 C7 C8 119.1(11) . . ? 
C13 C8 C7 121.3(12) . . ? 
C13 C8 C9 120.6(10) . . ? 
C7 C8 C9 118.1(11) . . ? 
C10 C9 C8 116.9(12) . . ? 
C10 C9 H9A 121.4 . . ? 
C8 C9 H9A 121.7 . . ? 
C9 C10 C11 121.5(12) . . ? 
C9 C10 H10A 119.1 . . ? 
C11 C10 H10A 119.4 . . ? 
C12 C11 C10 119.0(10) . . ? 
C12 C11 C14 122.2(11) . . ? 
C10 C11 C14 118.8(10) . . ? 
C11 C12 C13 123.6(11) . . ? 
C11 C12 H12A 118.2 . . ? 
C13 C12 H12A 118.2 . . ? 
C8 C13 C12 117.6(11) . . ? 
C8 C13 H13A 121.1 . . ? 
C12 C13 H13A 121.3 . . ? 
O10 C14 O9 125.9(9) . . ? 
O10 C14 C11 116.0(10) . . ? 
O9 C14 C11 117.8(10) . . ? 
O12 C15 O11 126.9(10) . . ? 
O12 C15 C16 117.3(12) . . ? 
O11 C15 C16 115.5(12) . . ? 
C19 C18 C17 121.2(10) . . ? 
C19 C18 H18A 119.6 . . ? 
C17 C18 H18A 119.2 . . ? 
C20 C19 C18 119.4(8) . . ? 
C20 C19 C22 120.4(10) . . ? 
C18 C19 C22 120.1(10) . . ? 
C19 C20 C21 123.3(10) . . ? 
C19 C20 H20A 118.5 . . ? 
C21 C20 H20A 118.2 . . ? 
C16 C21 C20 116.4(12) . . ? 
C16 C21 H21A 121.7 . . ? 
C20 C21 H21A 121.9 . . ? 
O14 C22 O13 128.0(10) . . ? 
O14 C22 C19 117.7(11) . . ? 
O13 C22 C19 113.9(11) . . ? 
C2 N1 Zn4 114.7(7) . 1_556 ? 
C2 N1 Zn1 117.0(7) . . ? 
Zn4 N1 Zn1 127.7(4) 1_556 . ? 
C5 N2 Zn3 116.7(7) . . ? 
C5 N2 Zn2 111.7(7) . . ? 
Zn3 N2 Zn2 131.6(4) . . ? 
C3 O3 Zn4 103.2(8) . 1_556 ? 
C6 O6 Zn2 108.5(7) . . ? 
C18 C17 C16 117.3(13) . . ? 
C18 C17 H17A 121.7 . . ? 
C16 C17 H17A 121.0 . . ? 
C21 C16 C17 122.1(11) . . ? 
C21 C16 C15 119.2(12) . . ? 
C17 C16 C15 118.5(12) . . ? 
  
_diffrn_measured_fraction_theta_max    0.997 
_diffrn_reflns_theta_full              89.85 
_diffrn_measured_fraction_theta_full   0.997 
_refine_diff_density_max    0.666 
_refine_diff_density_min   -0.643 
_refine_diff_density_rms    0.096 

#END

  
data_825850 
  
_audit_creation_method            SHELXL-97 
_chemical_name_systematic 
; 
 ? 
; 
_chemical_name_common             ? 
_chemical_melting_point           ? 
_chemical_formula_moiety          ? 
_chemical_formula_sum 
 'C22 H14 N2 O14 Zn4' 
_chemical_formula_weight          791.83 
  
loop_ 
 _atom_type_symbol 
 _atom_type_description 
 _atom_type_scat_dispersion_real 
 _atom_type_scat_dispersion_imag 
 _atom_type_scat_source 
 'C'  'C'   0.0033   0.0016 
 'International Tables Vol C Tables 4.2.6.8 and 6.1.1.4' 
 'H'  'H'   0.0000   0.0000 
 'International Tables Vol C Tables 4.2.6.8 and 6.1.1.4' 
 'N'  'N'   0.0061   0.0033 
 'International Tables Vol C Tables 4.2.6.8 and 6.1.1.4' 
 'O'  'O'   0.0106   0.0060 
 'International Tables Vol C Tables 4.2.6.8 and 6.1.1.4' 
 'Zn'  'Zn'   0.2839   1.4301 
 'International Tables Vol C Tables 4.2.6.8 and 6.1.1.4' 
  
_symmetry_cell_setting            Monoclinic 
_symmetry_space_group_name_H-M    P2(1) 
  
loop_ 
 _symmetry_equiv_pos_as_xyz 
 'x, y, z' 
 '-x, y+1/2, -z' 
  
_cell_length_a                    19.420(13) 
_cell_length_b                    14.437(10) 
_cell_length_c                    10.337(7) 
_cell_angle_alpha                 90.00 
_cell_angle_beta                  89.731(13) 
_cell_angle_gamma                 90.00 
_cell_volume                      2898(3) 
_cell_formula_units_Z             2 
_cell_measurement_temperature     293(2) 
_cell_measurement_reflns_used     996
_cell_measurement_theta_min       3.18
_cell_measurement_theta_max       25.03 
  
_exptl_crystal_description        prism 
_exptl_crystal_colour             colorless 
_exptl_crystal_size_max           .26 
_exptl_crystal_size_mid           .14 
_exptl_crystal_size_min           .09 
_exptl_crystal_density_meas       ? 
_exptl_crystal_density_diffrn     0.907 
_exptl_crystal_density_method     'not measured' 
_exptl_crystal_F_000              784 
_exptl_absorpt_coefficient_mu     1.670 
_exptl_absorpt_correction_type    none 
_exptl_absorpt_correction_T_min   ? 
_exptl_absorpt_correction_T_max   ? 
_exptl_absorpt_process_details    none 
  
_exptl_special_details 
; 
 ? 
; 
  
_diffrn_ambient_temperature       293(2) 
_diffrn_radiation_wavelength      0.71073 
_diffrn_radiation_type            MoK\a 
_diffrn_radiation_source          'fine-focus sealed tube' 
_diffrn_radiation_monochromator   graphite 
_diffrn_measurement_device_type   'Bruker P4' 
_diffrn_measurement_method        '\w scans' 
_diffrn_detector_area_resol_mean  none  
_diffrn_standards_number          none  
_diffrn_standards_interval_count  none  
_diffrn_standards_interval_time   none  
_diffrn_standards_decay_%         none  
_diffrn_reflns_number             24911 
_diffrn_reflns_av_R_equivalents   0.0639 
_diffrn_reflns_av_sigmaI/netI     0.1095 
_diffrn_reflns_limit_h_min        -22 
_diffrn_reflns_limit_h_max        25 
_diffrn_reflns_limit_k_min        -18 
_diffrn_reflns_limit_k_max        18 
_diffrn_reflns_limit_l_min        -13 
_diffrn_reflns_limit_l_max        13 
_diffrn_reflns_theta_min          2.10 
_diffrn_reflns_theta_max          27.53 
_reflns_number_total              12843 
_reflns_number_gt                 7176 
_reflns_threshold_expression      >2sigma(I) 
  
_computing_data_collection        'Bruker XSCANS' 
_computing_cell_refinement        'Bruker XSCANS' 
_computing_data_reduction         'Bruker SHELXTL' 
_computing_structure_solution     'SHELXS-97 (Sheldrick, 1990)' 
_computing_structure_refinement   'SHELXL-97 (Sheldrick, 1997)' 
_computing_molecular_graphics     'Bruker SHELXTL' 
_computing_publication_material   'Bruker SHELXTL' 
  
_refine_special_details 
; 
 Refinement of F^2^ against ALL reflections.  The weighted R-factor wR and 
 goodness of fit S are based on F^2^, conventional R-factors R are based 
 on F, with F set to zero for negative F^2^. The threshold expression of 
 F^2^ > 2sigma(F^2^) is used only for calculating R-factors(gt) etc. and is 
 not relevant to the choice of reflections for refinement.  R-factors based 
 on F^2^ are statistically about twice as large as those based on F, and R- 
 factors based on ALL data will be even larger. 
; 
  
_refine_ls_structure_factor_coef  Fsqd 
_refine_ls_matrix_type            full 
_refine_ls_weighting_scheme       calc 
_refine_ls_weighting_details 
 'calc w=1/[\s^2^(Fo^2^)+(0.0818P)^2^+0.0000P] where P=(Fo^2^+2Fc^2^)/3' 
_atom_sites_solution_primary      direct 
_atom_sites_solution_secondary    difmap 
_atom_sites_solution_hydrogens    geom 
_refine_ls_hydrogen_treatment     none  
_refine_ls_extinction_method      none 
_refine_ls_extinction_coef        ? 
_refine_ls_abs_structure_details 
 'Flack H D (1983), Acta Cryst. A39, 876-881' 
_refine_ls_abs_structure_Flack    0.00(2) 
_refine_ls_number_reflns          12843 
_refine_ls_number_parameters      379 
_refine_ls_number_restraints      1 
_refine_ls_R_factor_all           0.1010 
_refine_ls_R_factor_gt            0.0713 
_refine_ls_wR_factor_ref          0.2083 
_refine_ls_wR_factor_gt           0.1904 
_refine_ls_goodness_of_fit_ref    0.955 
_refine_ls_restrained_S_all       0.955 
_refine_ls_shift/su_max           0.075 
_refine_ls_shift/su_mean          0.005 
  
loop_ 
 _atom_site_label 
 _atom_site_type_symbol 
 _atom_site_fract_x 
 _atom_site_fract_y 
 _atom_site_fract_z 
 _atom_site_U_iso_or_equiv 
 _atom_site_adp_type 
 _atom_site_occupancy 
 _atom_site_symmetry_multiplicity 
 _atom_site_calc_flag 
 _atom_site_refinement_flags 
 _atom_site_disorder_assembly 
 _atom_site_disorder_group 
Zn1 Zn 0.24855(8) 0.08401(8) 1.34557(14) 0.0495(4) Uani 1 1 d . . . 
Zn2 Zn 0.24971(8) 0.01496(9) 1.03085(15) 0.0526(4) Uani 1 1 d . . . 
Zn3 Zn 0.25139(8) 0.21990(9) 0.84495(15) 0.0488(4) Uani 1 1 d . . . 
Zn4 Zn 0.25029(8) 0.28938(9) 0.53006(14) 0.0528(4) Uani 1 1 d . . . 
N1 N 0.2458(5) 0.0856(9) 0.8683(8) 0.036(2) Uani 1 1 d . . . 
N2 N 0.2533(6) 0.2175(9) 0.3736(9) 0.055(3) Uani 1 1 d . . . 
O1 O 0.1621(5) -0.0316(8) 1.1035(10) 0.094(3) Uani 1 1 d . . . 
O2 O 0.1648(5) 0.0121(9) 1.3102(11) 0.097(4) Uani 1 1 d . . . 
O3 O -0.1643(5) -0.1633(7) 1.3941(8) 0.076(4) Uani 1 1 d . . . 
O4 O -0.1630(4) -0.2107(8) 1.1831(7) 0.080(3) Uani 1 1 d . . . 
O5 O 0.3343(5) -0.0360(9) 1.1049(7) 0.099(4) Uani 1 1 d . . . 
O6 O 0.3328(5) 0.0127(9) 1.3086(8) 0.081(3) Uani 1 1 d . . . 
O7 O 0.6633(5) -0.1686(8) 1.3951(11) 0.106(4) Uani 1 1 d . . . 
O8 O 0.6619(5) -0.2120(11) 1.1852(9) 0.094(4) Uani 1 1 d . . . 
O9 O 0.2449(7) -0.1022(12) 0.8883(14) 0.143(5) Uani 1 1 d . . . 
O10 O 0.2499(4) 0.1666(6) 0.6431(8) 0.060(3) Uani 1 1 d . . . 
O11 O 0.2532(6) 0.0385(7) 0.5363(7) 0.092(4) Uani 1 1 d . . . 
O12 O 0.2540(7) 0.3984(5) 0.3944(6) 0.135(6) Uani 1 1 d . . . 
O13 O 0.2494(6) 0.2602(9) 0.0290(9) 0.092(4) Uani 1 1 d . . . 
O14 O 0.2504(5) 0.1290(6) 0.1470(7) 0.059(3) Uani 1 1 d . . . 
C1 C 0.1306(7) -0.0267(10) 1.2082(14) 0.066(4) Uani 1 1 d . . . 
C2 C 0.0620(8) -0.0663(11) 1.2308(14) 0.084(5) Uani 1 1 d . . . 
C3 C 0.0312(7) -0.0956(10) 1.1264(14) 0.082(4) Uani 1 1 d . . . 
H3A H 0.0503 -0.0867 1.0447 0.098 Uiso 1 1 calc R . . 
C4 C -0.0345(8) -0.1430(14) 1.1443(15) 0.111(6) Uani 1 1 d . . . 
H4A H -0.0544 -0.1755 1.0764 0.133 Uiso 1 1 calc R . . 
C5 C -0.0672(7) -0.1387(11) 1.2657(11) 0.078(5) Uani 1 1 d . . . 
C6 C -0.1443(6) -0.1691(11) 1.2785(15) 0.072(4) Uani 1 1 d . . . 
C7 C -0.0334(8) -0.0800(12) 1.3713(16) 0.113(6) Uani 1 1 d . . . 
H7A H -0.0582 -0.0565 1.4411 0.135 Uiso 1 1 calc R . . 
C8 C 0.0369(6) -0.0643(12) 1.3560(10) 0.091(6) Uani 1 1 d . . . 
H8A H 0.0654 -0.0530 1.4262 0.109 Uiso 1 1 calc R . . 
C9 C 0.3567(8) -0.0248(12) 1.2077(15) 0.093(5) Uani 1 1 d . . . 
C10 C 0.4341(6) -0.0649(8) 1.2436(12) 0.069(4) Uani 1 1 d . . . 
C11 C 0.4630(6) -0.0675(11) 1.3529(10) 0.084(5) Uani 1 1 d . . . 
H11A H 0.4369 -0.0511 1.4250 0.101 Uiso 1 1 calc R . . 
C12 C 0.5288(7) -0.0925(13) 1.3721(12) 0.108(7) Uani 1 1 d . . . 
H12A H 0.5507 -0.0802 1.4501 0.130 Uiso 1 1 calc R . . 
C13 C 0.5643(7) -0.1387(12) 1.2689(13) 0.100(6) Uani 1 1 d . . . 
C14 C 0.6383(7) -0.1725(10) 1.2760(12) 0.062(4) Uani 1 1 d . . . 
C15 C 0.5298(8) -0.1446(13) 1.1377(15) 0.096(5) Uani 1 1 d . . . 
H15A H 0.5495 -0.1749 1.0672 0.115 Uiso 1 1 calc R . . 
C16 C 0.4655(7) -0.1000(12) 1.1322(13) 0.099(6) Uani 1 1 d . . . 
H16A H 0.4435 -0.0938 1.0530 0.119 Uiso 1 1 calc R . . 
C17 C 0.2459(13) -0.0493(16) 0.769(2) 0.107(8) Uani 1 1 d . . . 
H17A H 0.2799 -0.0793 0.7140 0.129 Uiso 1 1 calc R . . 
H17B H 0.2016 -0.0608 0.7284 0.129 Uiso 1 1 calc R . . 
C19 C 0.2547(7) 0.0811(7) 0.6351(11) 0.049(3) Uani 1 1 d . . . 
C20 C 0.2468(11) 0.3664(8) 0.2625(10) 0.126(9) Uani 1 1 d . . . 
H20A H 0.1987 0.3535 0.2447 0.151 Uiso 1 1 calc R . . 
H20B H 0.2623 0.4142 0.2031 0.151 Uiso 1 1 calc R . . 
C22 C 0.2471(7) 0.2082(13) 0.1340(11) 0.073(5) Uani 1 1 d . . . 
C18 C 0.2558(15) 0.031(3) 0.757(3) 0.146(12) Uani 1 1 d . . . 
C21 C 0.2781(14) 0.302(3) 0.248(3) 0.230(12) Uani 1 1 d . . . 
H21A H 0.3278 0.3136 0.2435 0.276 Uiso 1 1 calc R . . 
  
loop_ 
 _atom_site_aniso_label 
 _atom_site_aniso_U_11 
 _atom_site_aniso_U_22 
 _atom_site_aniso_U_33 
 _atom_site_aniso_U_23 
 _atom_site_aniso_U_13 
 _atom_site_aniso_U_12 
Zn1 0.0663(11) 0.0515(9) 0.0307(7) -0.0017(7) 0.0009(7) -0.0003(8) 
Zn2 0.0716(11) 0.0510(9) 0.0354(8) 0.0025(8) -0.0003(7) 0.0014(8) 
Zn3 0.0537(9) 0.0563(10) 0.0365(8) 0.0010(8) -0.0006(7) -0.0005(8) 
Zn4 0.0667(11) 0.0592(10) 0.0324(8) -0.0022(8) -0.0009(7) -0.0006(9) 
N1 0.067(7) 0.033(5) 0.009(4) -0.001(4) -0.006(4) 0.000(5) 
N2 0.091(8) 0.055(6) 0.020(5) 0.015(5) 0.003(5) -0.017(6) 
O1 0.081(7) 0.107(8) 0.092(7) -0.007(7) 0.018(6) -0.007(6) 
O2 0.091(8) 0.107(8) 0.094(8) 0.016(8) -0.001(7) -0.009(7) 
O3 0.091(7) 0.091(8) 0.047(5) -0.014(5) 0.026(5) -0.061(6) 
O4 0.071(5) 0.128(9) 0.042(4) 0.016(6) -0.012(4) -0.065(6) 
O5 0.123(9) 0.133(10) 0.041(4) -0.013(6) -0.032(5) 0.072(8) 
O6 0.077(6) 0.111(8) 0.056(6) 0.022(6) -0.009(5) 0.048(6) 
O7 0.065(6) 0.096(8) 0.157(10) -0.020(8) -0.015(6) 0.026(6) 
O8 0.094(8) 0.139(11) 0.048(5) 0.015(7) 0.001(5) 0.022(8) 
O9 0.219(12) 0.119(12) 0.091(12) 0.029(11) 0.001(9) -0.031(10) 
O10 0.072(6) 0.061(5) 0.049(5) 0.033(5) -0.005(4) -0.031(4) 
O11 0.213(12) 0.044(6) 0.020(4) 0.010(4) 0.001(5) 0.005(6) 
O12 0.358(18) 0.030(3) 0.017(3) 0.003(3) -0.012(6) -0.023(6) 
O13 0.166(11) 0.073(9) 0.036(5) 0.009(6) -0.014(6) 0.035(7) 
O14 0.118(8) 0.028(4) 0.031(4) 0.007(3) -0.005(4) -0.017(4) 
C1 0.066(9) 0.068(8) 0.065(8) 0.001(7) -0.006(7) 0.002(7) 
C2 0.084(11) 0.073(10) 0.096(11) 0.007(10) 0.005(9) -0.005(9) 
C3 0.087(9) 0.097(8) 0.061(8) -0.015(7) -0.005(7) -0.019(7) 
C4 0.118(14) 0.118(13) 0.097(13) 0.007(11) 0.007(10) -0.043(11) 
C5 0.071(9) 0.115(12) 0.048(7) -0.006(8) -0.020(6) -0.067(9) 
C6 0.030(5) 0.085(9) 0.102(10) -0.006(8) -0.010(6) -0.043(6) 
C7 0.104(12) 0.141(12) 0.093(12) -0.020(10) 0.009(10) -0.042(10) 
C8 0.077(9) 0.151(15) 0.045(6) -0.039(8) 0.016(6) -0.083(10) 
C9 0.085(10) 0.114(12) 0.080(10) 0.001(9) 0.014(8) 0.058(9) 
C10 0.070(9) 0.054(6) 0.082(9) -0.010(6) 0.034(7) 0.000(6) 
C11 0.070(7) 0.140(12) 0.042(6) -0.031(7) -0.014(5) 0.080(8) 
C12 0.072(10) 0.190(18) 0.062(8) -0.047(11) 0.000(7) 0.030(11) 
C13 0.105(11) 0.127(13) 0.069(9) 0.018(9) -0.031(8) 0.087(10) 
C14 0.091(9) 0.062(7) 0.032(5) 0.012(5) -0.023(6) -0.009(7) 
C15 0.101(11) 0.107(11) 0.079(11) 0.003(9) 0.023(9) 0.018(10) 
C16 0.097(11) 0.119(14) 0.082(10) 0.020(10) -0.022(8) 0.062(11) 
C17 0.144(18) 0.078(19) 0.099(19) 0.008(17) 0.038(15) -0.050(17) 
C19 0.095(8) 0.011(3) 0.042(6) -0.010(4) -0.005(5) 0.016(4) 
C20 0.32(3) 0.034(4) 0.026(5) 0.000(4) -0.003(9) 0.030(9) 
C22 0.080(9) 0.120(14) 0.021(5) -0.013(7) 0.004(5) -0.041(9) 
C18 0.39(2) 0.00(3) 0.05(3) 0.04(2) -0.057(19) -0.05(2) 
C21 0.32(3) 0.27(3) 0.10(3) -0.05(3) -0.04(2) 0.07(3) 
  
_geom_special_details 
; 
 All esds (except the esd in the dihedral angle between two l.s. planes) 
 are estimated using the full covariance matrix.  The cell esds are taken 
 into account individually in the estimation of esds in distances, angles 
 and torsion angles; correlations between esds in cell parameters are only 
 used when they are defined by crystal symmetry.  An approximate (isotropic) 
 treatment of cell esds is used for estimating esds involving l.s. planes. 
; 
  
loop_ 
 _geom_bond_atom_site_label_1 
 _geom_bond_atom_site_label_2 
 _geom_bond_distance 
 _geom_bond_site_symmetry_2 
 _geom_bond_publ_flag 
Zn1 N2 1.951(14) 1_556 ? 
Zn1 O2 1.965(12) . ? 
Zn1 O6 1.968(10) . ? 
Zn1 O11 2.080(8) 1_556 ? 
Zn1 O14 2.153(8) 1_556 ? 
Zn2 O5 1.959(9) . ? 
Zn2 N1 1.967(10) . ? 
Zn2 O1 1.974(11) . ? 
Zn2 O14 2.038(9) 1_556 ? 
Zn2 O9 2.245(16) . ? 
Zn3 N1 1.956(13) . ? 
Zn3 O8 1.973(11) 2_657 ? 
Zn3 O13 1.989(10) 1_556 ? 
Zn3 O4 2.010(7) 2_557 ? 
Zn3 O10 2.225(9) . ? 
Zn4 N2 1.922(12) . ? 
Zn4 O7 1.948(10) 2_657 ? 
Zn4 O3 1.964(7) 2_557 ? 
Zn4 O10 2.123(8) . ? 
Zn4 O12 2.109(7) . ? 
N1 C18 1.41(3) . ? 
N2 C21 1.84(3) . ? 
N2 Zn1 1.951(14) 1_554 ? 
O1 C1 1.243(14) . ? 
O2 C1 1.368(16) . ? 
O3 C6 1.258(15) . ? 
O3 Zn4 1.964(7) 2_547 ? 
O4 C6 1.212(15) . ? 
O4 Zn3 2.010(7) 2_547 ? 
O5 C9 1.162(18) . ? 
O6 C9 1.262(16) . ? 
O7 C14 1.326(14) . ? 
O7 Zn4 1.948(10) 2_647 ? 
O8 C14 1.188(16) . ? 
O8 Zn3 1.973(11) 2_647 ? 
O9 C17 1.45(2) . ? 
O10 C19 1.239(13) . ? 
O11 C19 1.193(13) . ? 
O11 Zn1 2.080(8) 1_554 ? 
O12 C20 1.446(12) . ? 
O13 C22 1.320(17) . ? 
O13 Zn3 1.989(10) 1_554 ? 
O14 C22 1.15(2) . ? 
O14 Zn2 2.038(9) 1_554 ? 
O14 Zn1 2.153(8) 1_554 ? 
C1 C2 1.468(18) . ? 
C2 C3 1.306(18) . ? 
C2 C8 1.381(16) . ? 
C3 C4 1.459(19) . ? 
C3 H3A 0.9300 . ? 
C4 C5 1.405(18) . ? 
C4 H4A 0.9300 . ? 
C5 C7 1.531(19) . ? 
C5 C6 1.566(14) . ? 
C7 C8 1.391(17) . ? 
C7 H7A 0.9300 . ? 
C8 H8A 0.9300 . ? 
C9 C10 1.653(18) . ? 
C10 C11 1.265(16) . ? 
C10 C16 1.396(17) . ? 
C11 C12 1.343(16) . ? 
C11 H11A 0.9300 . ? 
C12 C13 1.432(18) . ? 
C12 H12A 0.9300 . ? 
C13 C15 1.517(18) . ? 
C13 C14 1.521(17) . ? 
C15 C16 1.408(18) . ? 
C15 H15A 0.9300 . ? 
C16 H16A 0.9300 . ? 
C17 C18 1.18(4) . ? 
C17 H17A 0.9700 . ? 
C17 H17B 0.9700 . ? 
C19 C18 1.45(3) . ? 
C20 C21 1.12(4) . ? 
C20 H20A 0.9700 . ? 
C20 H20B 0.9700 . ? 
C22 C21 1.90(3) . ? 
C21 H21A 0.9800 . ? 
  
loop_ 
 _geom_angle_atom_site_label_1 
 _geom_angle_atom_site_label_2 
 _geom_angle_atom_site_label_3 
 _geom_angle 
 _geom_angle_site_symmetry_1 
 _geom_angle_site_symmetry_3 
 _geom_angle_publ_flag 
N2 Zn1 O2 126.1(5) 1_556 . ? 
N2 Zn1 O6 120.3(5) 1_556 . ? 
O2 Zn1 O6 112.0(5) . . ? 
N2 Zn1 O11 99.7(4) 1_556 1_556 ? 
O2 Zn1 O11 92.8(4) . 1_556 ? 
O6 Zn1 O11 88.8(4) . 1_556 ? 
N2 Zn1 O14 81.0(4) 1_556 1_556 ? 
O2 Zn1 O14 89.5(4) . 1_556 ? 
O6 Zn1 O14 87.9(3) . 1_556 ? 
O11 Zn1 O14 176.4(4) 1_556 1_556 ? 
O5 Zn2 N1 124.4(4) . . ? 
O5 Zn2 O1 116.5(5) . . ? 
N1 Zn2 O1 117.7(5) . . ? 
O5 Zn2 O14 93.8(4) . 1_556 ? 
N1 Zn2 O14 94.8(4) . 1_556 ? 
O1 Zn2 O14 93.4(4) . 1_556 ? 
O5 Zn2 O9 90.6(5) . . ? 
N1 Zn2 O9 80.1(5) . . ? 
O1 Zn2 O9 87.4(5) . . ? 
O14 Zn2 O9 174.6(5) 1_556 . ? 
N1 Zn3 O8 124.0(5) . 2_657 ? 
N1 Zn3 O13 99.8(4) . 1_556 ? 
O8 Zn3 O13 91.0(5) 2_657 1_556 ? 
N1 Zn3 O4 117.7(5) . 2_557 ? 
O8 Zn3 O4 117.2(6) 2_657 2_557 ? 
O13 Zn3 O4 88.8(4) 1_556 2_557 ? 
N1 Zn3 O10 76.8(3) . . ? 
O8 Zn3 O10 92.2(3) 2_657 . ? 
O13 Zn3 O10 176.2(4) 1_556 . ? 
O4 Zn3 O10 91.3(3) 2_557 . ? 
N2 Zn4 O7 118.6(5) . 2_657 ? 
N2 Zn4 O3 123.1(5) . 2_557 ? 
O7 Zn4 O3 117.7(5) 2_657 2_557 ? 
N2 Zn4 O10 90.7(4) . . ? 
O7 Zn4 O10 92.4(4) 2_657 . ? 
O3 Zn4 O10 94.0(4) 2_557 . ? 
N2 Zn4 O12 80.9(4) . . ? 
O7 Zn4 O12 90.3(5) 2_657 . ? 
O3 Zn4 O12 91.9(4) 2_557 . ? 
O10 Zn4 O12 171.5(3) . . ? 
C18 N1 Zn3 116.4(15) . . ? 
C18 N1 Zn2 113.8(15) . . ? 
Zn3 N1 Zn2 128.1(6) . . ? 
C21 N2 Zn4 103.8(11) . . ? 
C21 N2 Zn1 124.3(11) . 1_554 ? 
Zn4 N2 Zn1 131.1(5) . 1_554 ? 
C1 O1 Zn2 137.0(11) . . ? 
C1 O2 Zn1 139.9(10) . . ? 
C6 O3 Zn4 127.9(8) . 2_547 ? 
C6 O4 Zn3 128.6(8) . 2_547 ? 
C9 O5 Zn2 128.6(10) . . ? 
C9 O6 Zn1 133.5(10) . . ? 
C14 O7 Zn4 132.4(10) . 2_647 ? 
C14 O8 Zn3 133.6(10) . 2_647 ? 
C17 O9 Zn2 99.3(12) . . ? 
C19 O10 Zn4 142.6(9) . . ? 
C19 O10 Zn3 113.9(8) . . ? 
Zn4 O10 Zn3 103.1(4) . . ? 
C19 O11 Zn1 130.6(8) . 1_554 ? 
C20 O12 Zn4 112.7(6) . . ? 
C22 O13 Zn3 128.4(11) . 1_554 ? 
C22 O14 Zn2 137.1(9) . 1_554 ? 
C22 O14 Zn1 114.2(9) . 1_554 ? 
Zn2 O14 Zn1 108.5(4) 1_554 1_554 ? 
O1 C1 O2 117.0(14) . . ? 
O1 C1 C2 124.0(14) . . ? 
O2 C1 C2 118.8(13) . . ? 
C3 C2 C8 128.3(15) . . ? 
C3 C2 C1 114.4(13) . . ? 
C8 C2 C1 117.2(14) . . ? 
C2 C3 C4 116.8(14) . . ? 
C2 C3 H3A 122.2 . . ? 
C4 C3 H3A 121.0 . . ? 
C5 C4 C3 118.9(16) . . ? 
C5 C4 H4A 120.3 . . ? 
C3 C4 H4A 120.8 . . ? 
C4 C5 C7 117.9(13) . . ? 
C4 C5 C6 119.4(12) . . ? 
C7 C5 C6 120.5(12) . . ? 
O4 C6 O3 135.5(11) . . ? 
O4 C6 C5 111.2(12) . . ? 
O3 C6 C5 110.6(11) . . ? 
C8 C7 C5 115.6(14) . . ? 
C8 C7 H7A 122.4 . . ? 
C5 C7 H7A 122.0 . . ? 
C2 C8 C7 116.4(13) . . ? 
C2 C8 H8A 122.6 . . ? 
C7 C8 H8A 120.9 . . ? 
O5 C9 O6 132.6(15) . . ? 
O5 C9 C10 120.1(12) . . ? 
O6 C9 C10 107.3(13) . . ? 
C11 C10 C16 122.1(12) . . ? 
C11 C10 C9 128.2(10) . . ? 
C16 C10 C9 109.6(12) . . ? 
C10 C11 C12 124.5(11) . . ? 
C10 C11 H11A 117.5 . . ? 
C12 C11 H11A 118.0 . . ? 
C11 C12 C13 118.0(12) . . ? 
C11 C12 H12A 121.1 . . ? 
C13 C12 H12A 120.9 . . ? 
C12 C13 C15 118.7(12) . . ? 
C12 C13 C14 124.4(12) . . ? 
C15 C13 C14 116.5(13) . . ? 
O8 C14 O7 127.8(14) . . ? 
O8 C14 C13 118.5(13) . . ? 
O7 C14 C13 112.4(12) . . ? 
C16 C15 C13 113.9(14) . . ? 
C16 C15 H15A 123.0 . . ? 
C13 C15 H15A 123.1 . . ? 
C10 C16 C15 121.2(14) . . ? 
C10 C16 H16A 119.9 . . ? 
C15 C16 H16A 118.9 . . ? 
C18 C17 O9 127(3) . . ? 
C18 C17 H17A 105.00 . . ? 
O9 C17 H17A 106.00 . . ? 
C18 C17 H17B 105.00 . . ? 
O9 C17 H17B 107.5 . . ? 
H17A C17 H17B 107.0 . . ? 
O11 C19 O10 124.6(13) . . ? 
O11 C19 C18 119.1(16) . . ? 
O10 C19 C18 116.1(17) . . ? 
C21 C20 O12 109(2) . . ? 
C21 C20 H20A 110.00 . . ? 
O12 C20 H20A 110.5 . . ? 
C21 C20 H20B 110.00 . . ? 
O12 C20 H20B 109.0 . . ? 
H20A C20 H20B 107.8 . . ? 
O14 C22 O13 131.1(15) . . ? 
O14 C22 C21 128.1(15) . . ? 
O13 C22 C21 95.5(14) . . ? 
C17 C18 N1 116(3) . . ? 
C17 C18 C19 125(3) . . ? 
N1 C18 C19 115(2) . . ? 
C20 C21 N2 109(2) . . ? 
C20 C21 C22 120(3) . . ? 
N2 C21 C22 83.1(15) . . ? 
C20 C21 H21A 113.00 . . ? 
N2 C21 H21A 114.00 . . ? 
C22 C21 H21A 112.0 . . ? 
  
_diffrn_measured_fraction_theta_max    0.988 
_diffrn_reflns_theta_full              27.53 
_diffrn_measured_fraction_theta_full   0.988 
_refine_diff_density_max    0.917 
_refine_diff_density_min   -0.751 
_refine_diff_density_rms    0.124 

#end
